# Supplementary material for: Genomic variation in cline shape across a hybrid zone
Source: PubMed Central journal article supplement (PMC3501626; doi:10.1002/ece3.375), 2012-10-01
Supplement: ece30002-2737-SD1.pdf [file ece30002-2737-SD1.pdf]

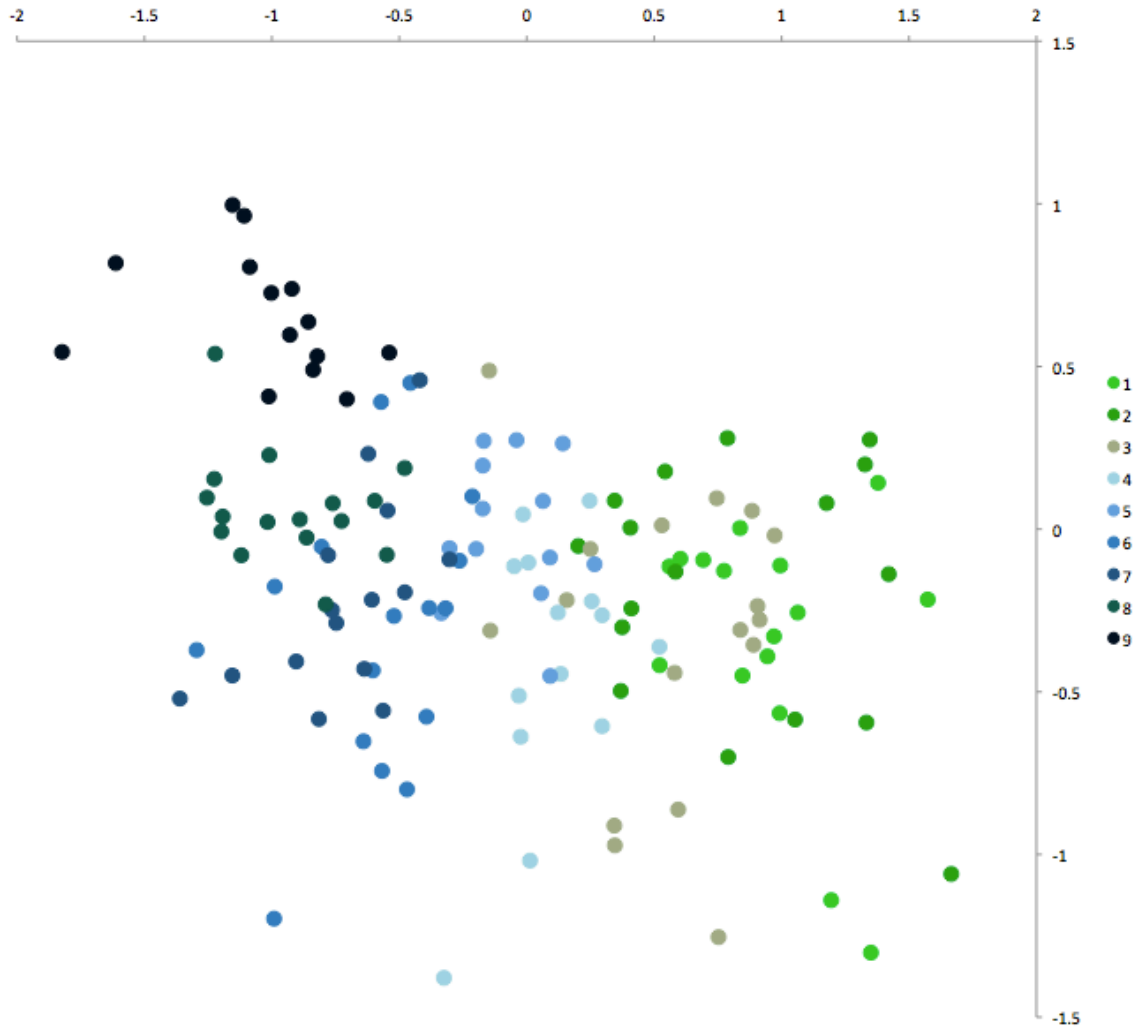

**Appendix Figure 1.** Non-metric multidimensional scaling analysis in two dimensions derived from a Jaccard similarity matrix based on the binary AFLP scores at 377 polymorphic loci for all individuals. Individuals are color-coded by sampling population.
