# Supplementary material for: Genomic variation in cline shape across a hybrid zone
Source: PubMed Central journal article supplement (PMC3501626; doi:10.1002/ece3.375), 2012-10-01
Supplement: ece30002-2737-SD4.pdf [file ece30002-2737-SD4.pdf]

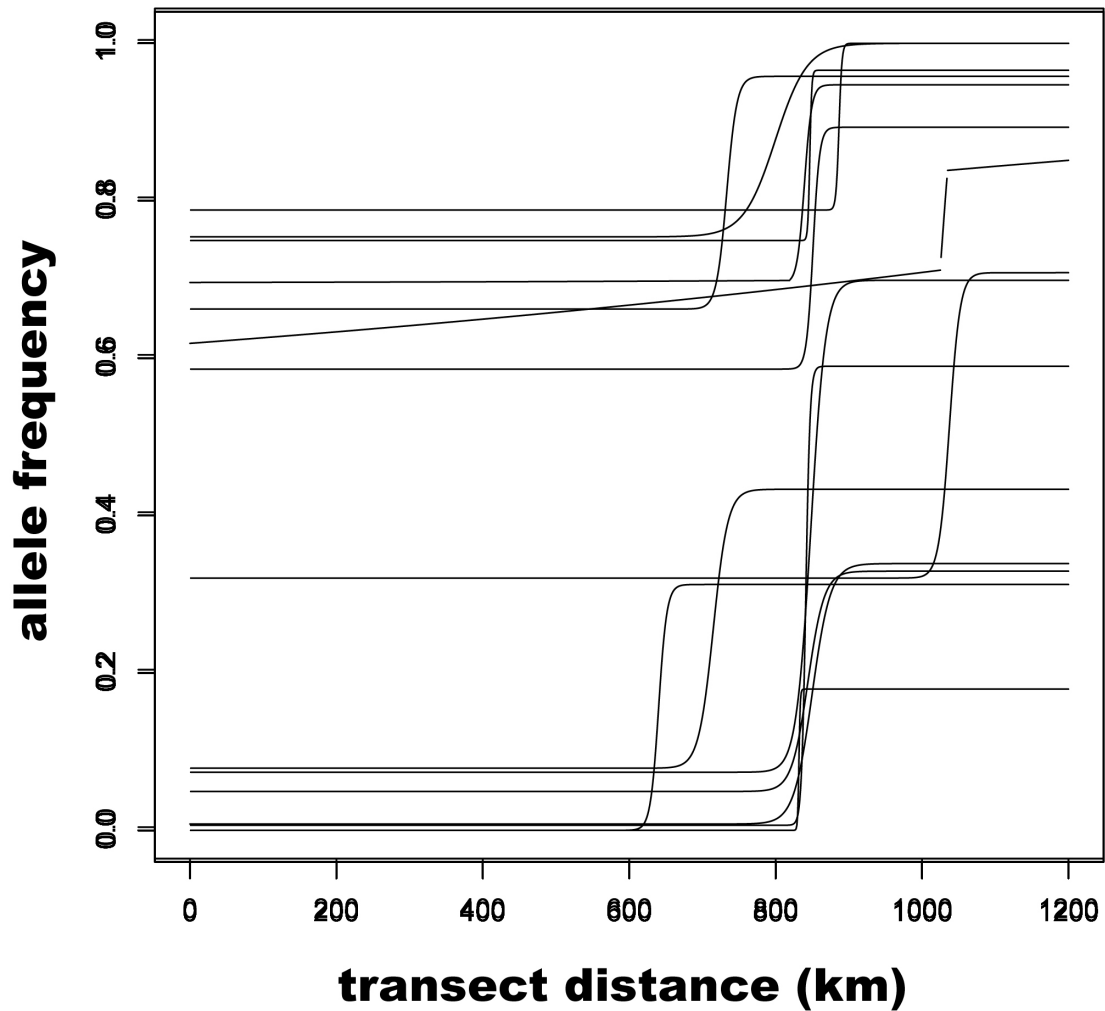

**Appendix Figure 3.** Exemplary cline fits where change in allele frequency over the transect is relatively small, but cline width is narrow.

**Appendix Table 1.** Tissue and voucher specimen numbers listed by population. Tissue samples were deposited at the US National Museum of Natural History and vouchers were deposited at Louisiana State University Museum of Natural Science.

| <b>USNM<br/>Tissue No.</b> | <b>Voucher No.</b> | <b>Population</b> |
|----------------------------|--------------------|-------------------|
| B00625                     | LSUMZ101112        | Coahuila          |
| B00626                     | LSUMZ101109        | Coahuila          |
| B00627                     | LSUMZ101110        | Coahuila          |
| B00628                     | LSUMZ101113        | Coahuila          |
| B00629                     | LSUMZ101114        | Coahuila          |
| B00630                     | LSUMZ101119        | Coahuila          |
| B00631                     | LSUMZ101121        | Coahuila          |
| B00632                     | LSUMZ101115        | Coahuila          |
| B00633                     | LSUMZ101120        | Coahuila          |

| <b>USNM<br/>Tissue No.</b> | <b>Voucher No.</b> | <b>Population</b> |
|----------------------------|--------------------|-------------------|
| B00634                     | LSUMZ101122        | Coahuila          |
| B00635                     | LSUMZ101111        | Coahuila          |
| B00636                     | LSUMZ101116        | Coahuila          |
| B00637                     | LSUMZ101117        | Coahuila          |
| B00638                     | LSUMZ101123        | Coahuila          |
| B00639                     | LSUMZ101118        | Coahuila          |
| B00640                     | LSUMZ101146        | Coahuila          |
| B00641                     | LSUMZ101124        | Queretaro         |
| B00642                     | LSUMZ101128        | Queretaro         |
| B00643                     | LSUMZ101076        | Queretaro         |
| B00644                     | LSUMZ101127        | Queretaro         |
| B00645                     | LSUMZ101125        | Queretaro         |
| B00646                     | LSUMZ101126        | Queretaro         |
| B00647                     | LSUMZ101147        | Queretaro         |
| B00648                     | LSUMZ101132        | Queretaro         |
| B00649                     | LSUMZ101129        | Queretaro         |
| B00650                     | LSUMZ101131        | Queretaro         |
| B00651                     | LSUMZ101133        | Queretaro         |
| B00652                     | LSUMZ101130        | Queretaro         |
| B00653                     | LSUMZ101134        | Queretaro         |
| B00654                     | LSUMZ101137        | Queretaro         |
| B00655                     | LSUMZ101136        | Queretaro         |
| B00656                     | LSUMZ101135        | Queretaro         |
| B00657                     | LSUMZ101138        | Queretaro         |
| B00067                     | LSUMZ91346         | Tlaxco            |
| B00068                     | LSUMZ91347         | Tlaxco            |
| B00069                     | LSUMZ91348         | Tlaxco            |
| B00070                     | LSUMZ91349         | Tlaxco            |
| B00071                     | LSUMZ91350         | Tlaxco            |
| B00072                     | LSUMZ91351         | Tlaxco            |
| B00658                     | LSUMZ101077        | Tlaxco            |
| B00659                     | LSUMZ101081        | Tlaxco            |
| B00660                     | LSUMZ101082        | Tlaxco            |
| B00661                     | LSUMZ101083        | Tlaxco            |
| B00662                     | LSUMZ101079        | Tlaxco            |
| B00663                     | LSUMZ101080        | Tlaxco            |
| B00664                     | LSUMZ101084        | Tlaxco            |
| B00665                     | LSUMZ101078        | Tlaxco            |
| B00666                     | LSUMZ101148        | Tlaxco            |
| B00667                     | LSUMZ101086        | Tlaxco            |
| B00668                     | LSUMZ101085        | Tlaxco            |
| B00001                     | LSUMZ91332         | E. Huichautla     |
| B00002                     | LSUMZ91333         | E. Huichautla     |
| B00006                     | LSUMZ91334         | E. Huichautla     |
| B00007                     | LSUMZ91335         | E. Huichautla     |
| B00008                     | LSUMZ91336         | E. Huichautla     |

| <b>USNM<br/>Tissue No.</b> | <b>Voucher No.</b> | <b>Population</b> |
|----------------------------|--------------------|-------------------|
| B00009                     | LSUMZ91337         | E. Huichautla     |
| B00010                     | LSUMZ91338         | E. Huichautla     |
| B00011                     | LSUMZ91339         | E. Huichautla     |
| B00032                     | LSUMZ91340         | E. Huichautla     |
| B00033                     | LSUMZ91341         | E. Huichautla     |
| B00034                     | LSUMZ91342         | E. Huichautla     |
| B00035                     | LSUMZ91343         | E. Huichautla     |
| B00036                     | LSUMZ91344         | E. Huichautla     |
| B00037                     | LSUMZ91345         | E. Huichautla     |
| B00012                     | LSUMZ91325         | Teziutlán         |
| B00019                     | LSUMZ91326         | Teziutlán         |
| B00020                     | LSUMZ91327         | Teziutlán         |
| B00021                     | LSUMZ91328         | Teziutlán         |
| B00038                     | LSUMZ91317         | Teziutlán         |
| B00039                     | LSUMZ91318         | Teziutlán         |
| B00040                     | LSUMZ91319         | Teziutlán         |
| B00041                     | LSUMZ91320         | Teziutlán         |
| B00042                     | LSUMZ91321         | Teziutlán         |
| B00046                     | LSUMZ91329         | Teziutlán         |
| B00047                     | LSUMZ91330         | Teziutlán         |
| B00049                     | LSUMZ91331         | Teziutlán         |
| B00050                     | LSUMZ91322         | Teziutlán         |
| B00051                     | LSUMZ91323         | Teziutlán         |
| B00052                     | LSUMZ91324         | Teziutlán         |
| B00004                     | LSUMZ91316         | R. Palenquillo    |
| B00014                     | LSUMZ91304         | R. Palenquillo    |
| B00015                     | LSUMZ91305         | R. Palenquillo    |
| B00017                     | LSUMZ91306         | R. Palenquillo    |
| B00018                     | LSUMZ91307         | R. Palenquillo    |
| B00059                     | LSUMZ91304         | R. Palenquillo    |
| B00060                     | LSUMZ91305         | R. Palenquillo    |
| B00061                     | LSUMZ91310         | R. Palenquillo    |
| B00062                     | LSUMZ91311         | R. Palenquillo    |
| B00063                     | LSUMZ91312         | R. Palenquillo    |
| B00064                     | LSUMZ91313         | R. Palenquillo    |
| B00065                     | LSUMZ91314         | R. Palenquillo    |
| B00066                     | LSUMZ91315         | R. Palenquillo    |
| B00669                     | LSUMZ101058        | R. Palenquillo    |
| B00670                     | LSUMZ101075        | R. Palenquillo    |
| B00671                     | LSUMZ101074        | R. Palenquillo    |
| B00003                     | LSUMZ91289         | Cofre Perote      |
| B00005                     | LSUMZ91290         | Cofre Perote      |
| B00024                     | LSUMZ91291         | Cofre Perote      |
| B00025                     | LSUMZ91292         | Cofre Perote      |
| B00026                     | LSUMZ91293         | Cofre Perote      |
| B00027                     | LSUMZ91294         | Cofre Perote      |

| <b>USNM<br/>Tissue No.</b> | <b>Voucher No.</b> | <b>Population</b> |
|----------------------------|--------------------|-------------------|
| B00028                     | LSUMZ91295         | Cofre Perote      |
| B00029                     | LSUMZ91296         | Cofre Perote      |
| B00030                     | LSUMZ91297         | Cofre Perote      |
| B00053                     | LSUMZ91298         | Cofre Perote      |
| B00054                     | LSUMZ91299         | Cofre Perote      |
| B00055                     | LSUMZ91300         | Cofre Perote      |
| B00056                     | LSUMZ91301         | Cofre Perote      |
| B00057                     | LSUMZ91302         | Cofre Perote      |
| B00058                     | LSUMZ91303         | Cofre Perote      |
| B00676                     | LSUMZ101043        | Orizaba           |
| B00679                     | LSUMZ101044        | Orizaba           |
| B00683                     | LSUMZ101045        | Orizaba           |
| B00684                     | LSUMZ101046        | Orizaba           |
| B00688                     | LSUMZ101051        | Orizaba           |
| B00689                     | LSUMZ101048        | Orizaba           |
| B00690                     | LSUMZ101049        | Orizaba           |
| B00691                     | LSUMZ101050        | Orizaba           |
| B00692                     | LSUMZ101047        | Orizaba           |
| B00695                     | LSUMZ101055        | Orizaba           |
| B00696                     | LSUMZ101052        | Orizaba           |
| B00697                     | LSUMZ101056        | Orizaba           |
| B00698                     | LSUMZ101054        | Orizaba           |
| B00699                     | LSUMZ101073        | Orizaba           |
| B00700                     | LSUMZ101053        | Orizaba           |
| B00701                     | LSUMZ101057        | Orizaba           |
| B00703                     | LSUMZ101060        | Oaxaca            |
| B00704                     | LSUMZ101067        | Oaxaca            |
| B00705                     | LSUMZ101063        | Oaxaca            |
| B00706                     | LSUMZ101065        | Oaxaca            |
| B00707                     | LSUMZ101064        | Oaxaca            |
| B00709                     | LSUMZ101066        | Oaxaca            |
| B00710                     | LSUMZ101061        | Oaxaca            |
| B00711                     | LSUMZ101059        | Oaxaca            |
| B00712                     | LSUMZ101068        | Oaxaca            |
| B00714                     | LSUMZ101071        | Oaxaca            |
| B00716                     | LSUMZ101070        | Oaxaca            |
| B00717                     | LSUMZ101069        | Oaxaca            |
| B00718                     | LSUMZ101480        | Oaxaca            |
| B00723                     | LSUMZ101072        | Oaxaca            |
