# Supplementary material for: Genomic variation in cline shape across a hybrid zone
Source: PubMed Central journal article supplement (PMC3501626; doi:10.1002/ece3.375), 2012-10-01
Supplement: ece30002-2737-SD5.pdf [file ece30002-2737-SD5.pdf]

**Appendix Table 2.**

Inferred cline parameters for all loci and locus-specific  $F_{ST}$

| locus  | Type       | center  | width   | theta N | theta S    | BN            | BS            | pmin   | pmax   | transect-wide $F_{ST}$ |
|--------|------------|---------|---------|---------|------------|---------------|---------------|--------|--------|------------------------|
| mtDNA  | mtDNA RFLP | 841.54  | 14.66   | 0.0145  | 0.7567     | 25014685735   | 117314165095  | 0.0001 | 0.9642 | 0.859                  |
| DIP1   | isozyme    | 923.00  | 436.11  | 0.0683  | 0.1255     | 2629207686972 | 1471177871213 | 0.2719 | 0.9999 | 0.122                  |
| GOT1   | isozyme    | 802.45  | 337.90  | 0.4025  | 0.1805     | 997679893923  | 3070931114324 | 0.0384 | 0.8434 | 0.283                  |
| EDH    | isozyme    | 848.29  | 40.33   | 0.7872  | 9305269248 | 215854781821  | 7             | 0.0698 | 0.6947 | 0.379                  |
| TF     | isozyme    | 728.00  | 200.74  | 0.1175  | 0.1948     | 85            | 568090617618  | 0.0001 | 0.9035 | 0.424                  |
| EST2   | isozyme    | 848.36  | 102.49  | 0.3629  | 0.8888     | 88            | 500401715077  | 0.4908 | 0.9041 | 0.119                  |
| GPI    | isozyme    | 842.77  | 51.05   | 0.2269  | 0.3218     | 40            | 36            | 0.1551 | 0.9999 | 0.332                  |
| TRI2   | isozyme    | 976.34  | 450.57  | 0.9697  | 0.5055     | 4214766170223 | 3826153990072 | 0.0606 | 0.6721 | 0.155                  |
| 6PGD   | isozyme    | 759.81  | 112.04  | 0.2564  | 0.6586     | 181969208310  | 927608439613  | 0.7985 | 0.9999 | 0.021                  |
| DIP2   | isozyme    | 844.21  | 44.40   | 0.5625  | 0.7993     | 338662616126  | 374616181516  | 0.0453 | 0.3252 | 0.094                  |
| 01_114 | AFLP       | 851.07  | 17.83   | 0.2084  | 0.8584     | 19361033857   | 65119090017   | 0.5861 | 0.8933 | 0.293                  |
| 01_141 | AFLP       | 917.00  | 283.80  | 0.1611  | 0.9907     | 256           | 2110742974933 | 0.2809 | 0.9999 | 0.147                  |
| 01_148 | AFLP       | 816.44  | 449.71  | 0.0144  | 0.7560     | 2160840609    | 980268095     | 0.0001 | 0.3536 | 0.101                  |
| 01_203 | AFLP       | 842.79  | 169.82  | 0.3931  | 0.8680     | 298204932220  | 752872214961  | 0.0001 | 0.3357 | 0.124                  |
| 01_220 | AFLP       | 582.39  | 472.52  | 0.9702  | 0.1638     | 4156905602604 | 1624572537086 | 0.3641 | 0.9999 | 0.277                  |
| 01_409 | AFLP       | 666.91  | 1102.91 | 0.9770  | 0.9999     | 6052193617971 | 21            | 0.2164 | 0.8339 | 0.040                  |
| 02_215 | AFLP       | 1145.39 | 322.91  | 1.0000  | 0.0049     | 343           | 3975          | 0.0001 | 0.9982 | 0.301                  |
| 02_333 | AFLP       | 799.60  | 86.96   | 0.4281  | 0.4179     | 312944186829  | 286059191063  | 0.7541 | 0.9999 | 0.134                  |
| 02_342 | AFLP       | 733.17  | 27.81   | 0.3149  | 0.9636     | 107965818220  | 15167009022   | 0.6623 | 0.9580 | 0.221                  |
| 03_140 | AFLP       | 714.84  | 40.00   | 0.9928  | 0.9974     | 3606          | 1211          | 0.0790 | 0.4334 | 0.089                  |
| 03_402 | AFLP       | 841.16  | 11.52   | 0.9617  | 0.7706     | 48538338639   | 90299182601   | 0.0065 | 0.5897 | 0.649                  |
| 03_407 | AFLP       | 886.53  | 8.00    | 0.4778  | 0.4957     | 34119456739   | 19377420290   | 0.7881 | 0.9999 | 0.177                  |
| 04_125 | AFLP       | 849.91  | 50.06   | 0.9398  | 0.9738     | 84            | 480           | 0.0081 | 0.3390 | 0.166                  |
| 04_130 | AFLP       | 743.66  | 189.04  | 0.3543  | 0.6820     | 1532682836951 | 1888792059802 | 0.0001 | 0.5282 | 0.276                  |
| 04_218 | AFLP       | 831.83  | 3.46    | 0.0043  | 0.1881     | 647462468     | 31618008613   | 0.0001 | 0.1795 | 0.321                  |

| locus  | Type | center  | width   | theta N    | theta S    | BN            | BS            | pmin   | pmax   | transect-wide $F_{ST}$ |
|--------|------|---------|---------|------------|------------|---------------|---------------|--------|--------|------------------------|
| 04_428 | AFLP | 946.40  | 130.77  | 0.8888     | 0.3629     | 638482121986  | 113           | 0.0001 | 0.9999 | 0.551                  |
| 05_120 | AFLP | 790.75  | 149.75  | 0.2173     | 0.7940     | 1098557461678 | 642515851281  | 0.0312 | 0.6093 | 0.264                  |
| 05_187 | AFLP | 640.17  | 22.37   | 0.6656     | 0.1259     | 75479880620   | 139826931125  | 0.0001 | 0.3124 | 0.226                  |
| 05_190 | AFLP | 934.30  | 188.84  | 4619326976 | 2573597440 | 109           | 62            | 0.0001 | 0.7186 | 0.458                  |
| 05_216 | AFLP | 730.53  | 809.00  | 0.6320     | 0.6660     | 4667265447321 | 5180115450923 | 0.4648 | 0.9999 | 0.104                  |
| 05_225 | AFLP | 732.34  | 22.50   | 0.0026     | 0.3166     | 442           | 84055321352   | 0.0001 | 0.8956 | 0.546                  |
| 05_240 | AFLP | 973.32  | 439.78  | 0.1502     | 0.3162     | 753744322942  | 3745930469394 | 0.0001 | 0.6349 | 0.191                  |
| 05_258 | AFLP | 846.70  | 5.22    | 0.3801     | 0.7685     | 49917466010   | 23985803914   | 0.7494 | 0.9657 | 0.070                  |
| 09_165 | AFLP | 1026.90 | 40.06   | 0.0000     | 0.0000     | 27            | 39            | 0.4796 | 0.9999 | 0.141                  |
| 09_215 | AFLP | 917.00  | 1217.73 | 1.0000     | 1.0000     | 1218          | 1218          | 0.0001 | 0.8751 | 0.167                  |
| 09_217 | AFLP | 917.31  | 99.39   | 0.9468     | 0.9212     | 99            | 99            | 0.2964 | 0.9999 | 0.247                  |
| 09_232 | AFLP | 839.29  | 19.78   | 0.0002     | 0.4609     | 2333          | 41245963      | 0.6950 | 0.9472 | 0.066                  |
| 09_287 | AFLP | 819.92  | 160.98  | 0.7992     | 0.8365     | 1444386498490 | 1079119584783 | 0.3232 | 0.9999 | 0.297                  |
| 09_322 | AFLP | 802.08  | 92.95   | 0.8371     | 0.4432     | 918523525571  | 374496772682  | 0.5977 | 0.9550 | 0.171                  |
| 10_192 | AFLP | 1037.47 | 29.26   | 0.9357     | 0.0870     | 175867        | 1098          | 0.3206 | 0.7086 | 0.219                  |
| 10_194 | AFLP | 863.04  | 7.95    | 0.4494     | 0.1182     | 1290623850    | 67133132194   | 0.2990 | 0.8753 | 0.469                  |
| 10_216 | AFLP | 567.84  | 497.88  | 0.2305     | 0.2612     | 3461912019282 | 1112863523894 | 0.2532 | 0.9999 | 0.294                  |
| 10_288 | AFLP | 848.61  | 144.91  | 0.9997     | 0.9891     | 324           | 160401        | 0.3017 | 0.5729 | 0.146                  |
| 10_332 | AFLP | 743.05  | 138.43  | 0.2958     | 0.6210     | 364450853661  | 591988341230  | 0.3420 | 0.9999 | 0.396                  |
| 10_395 | AFLP | 851.55  | 12.18   | 0.3856     | 0.6984     | 54882868803   | 93274107327   | 0.1707 | 0.7420 | 0.256                  |
| 11_140 | AFLP | 840.48  | 52.59   | 0.1078     | 0.4331     | 138382876630  | 426085388837  | 0.0340 | 0.8320 | 0.591                  |
| 11_177 | AFLP | 711.86  | 37.38   | 0.8118     | 0.4175     | 134376572510  | 102622223582  | 0.0001 | 0.2857 | 0.127                  |
| 11_216 | AFLP | 850.95  | 105.88  | 0.0055     | 0.9851     | 916037054300  | 677177499743  | 0.0001 | 0.3019 | 0.245                  |
| 11_347 | AFLP | 798.67  | 90.14   | 0.0534     | 0.8992     | 54881956778   | 533210250414  | 0.0741 | 0.5279 | 0.152                  |
| 12_109 | AFLP | 826.34  | 43.08   | 0.0027     | 0.5789     | 509           | 41            | 0.0001 | 0.9999 | 0.501                  |
| 12_196 | AFLP | 760.81  | 332.31  | 0.3152     | 0.0527     | 2133099620383 | 2655234030043 | 0.6871 | 0.9999 | 0.177                  |
| 12_207 | AFLP | 857.84  | 6.64    | 0.3748     | 0.7631     | 4911262285    | 48105947299   | 0.0320 | 0.3277 | 0.146                  |
| 12_277 | AFLP | 831.77  | 3.71    | 0.6796     | 0.3690     | 24469771899   | 2651050797    | 0.6822 | 0.9137 | 0.134                  |
| 13_137 | AFLP | 832.10  | 3.69    | 0.4217     | 0.7657     | 8048501307    | 6139812471    | 0.7943 | 0.9999 | 0.292                  |
| 13_159 | AFLP | 794.09  | 5.23    | 0.1118     | 0.1921     | 4054573917    | 43662187994   | 0.3779 | 0.6591 | 0.127                  |

| <b>locus</b> | <b>Type</b> | <b>center</b> | <b>width</b> | <b>theta N</b> | <b>theta S</b> | <b>BN</b>     | <b>BS</b>     | <b>pmin</b> | <b>pmax</b> | <b>transect-wide F<sub>ST</sub></b> |
|--------------|-------------|---------------|--------------|----------------|----------------|---------------|---------------|-------------|-------------|-------------------------------------|
| 13_194       | AFLP        | 768.74        | 2382.19      | 0.0853         | 1.0000         | 3466152673965 | 54            | 0.0688      | 0.3624      | 0.076                               |
| 13_226       | AFLP        | 942.93        | 580.00       | 0.3654         | 0.2041         | 5272962061005 | 4647989098076 | 0.0001      | 0.8420      | 0.234                               |
| 13_229       | AFLP        | 704.25        | 796.18       | 0.1880         | 0.3205         | 796           | 796           | 0.0001      | 0.9999      | 0.249                               |
| 13_243       | AFLP        | 627.87        | 3303.57      | 1.0000         | 0.9999         | 3304          | 3304          | 0.0014      | 0.9999      | 0.099                               |
| 13_264       | AFLP        | 858.30        | 5.41         | 0.5714         | 0.6347         | 23342906074   | 53933760037   | 0.2950      | 0.7478      | 0.140                               |
| 13_295       | AFLP        | 814.66        | 7.94         | 0.3207         | 0.5834         | 26182761727   | 57761518464   | 0.0644      | 0.2943      | 0.270                               |
